# Supplementary material for: Rapid detection of Burkholderia cepacia complex carrying the 16S rRNA gene in clinical specimens by recombinase-aided amplification
Source: Front Cell Infect Microbiol. 2022 Sep 5;12:984140. doi: 10.3389/fcimb.2022.984140 (PMC9483118; doi:10.3389/fcimb.2022.984140)
Supplement: Supplementary file 3 [file Table_2.xlsx]

## Sheet: Sheet1
Supplemental Table 2 Strains used for phylogenetic trees constructing in this study
Organism	Strain	Source	Location	Genome accesion number
Burkholderia cenocepacia	MSMB384WGS	Environemnt	Australia	GCA_001718895.1
Burkholderia cenocepacia	DDS 22E-1	Environemnt	Australia	GCA_000755725.1
Burkholderia cenocepacia	CMCC(B)23006	Unknown	China	GCA_021535065.1
Burkholderia cenocepacia	toggle2	Patient	China	GCA_018223765.1
Burkholderia cenocepacia	toggle3	Patient	China	GCA_018228625.1
Burkholderia cenocepacia	ST32	Patient	Czech Republic	GCA_001484665.1
Burkholderia cenocepacia	2008Ycf657	Unknown	Germany	GCA_023374855.1
Burkholderia cenocepacia	2009Ycf95III	Unknown	Germany	GCA_023374835.1
Burkholderia cenocepacia	2019Y71443953II	Unknown	Germany	GCA_023374335.1
Burkholderia cenocepacia	R-12632 substr. R-75719	Plant	Italy	GCA_905400485.1
Burkholderia cenocepacia	R-12632 substr. R-75714	Plant	Italy	GCA_905400455.1
Burkholderia cenocepacia	R-12632 substr. R-75601	Plant	Italy	GCA_905400445.1
Burkholderia cenocepacia	R-12632 substr. R-75602	Plant	Italy	GCA_905400425.1
Burkholderia cenocepacia	R-12632 substr. R-75717	Plant	Italy	GCA_905400525.1
Burkholderia cenocepacia	R-12632 substr. R-75715	Plant	Italy	GCA_905400405.1
Burkholderia cenocepacia	R-12632 substr. R-75716	Plant	Italy	GCA_905400515.1
Burkholderia cenocepacia	R-12632 substr. R-75718	Plant	Italy	GCA_905400505.1
Burkholderia cenocepacia	VC7848	Patient	Canada	GCA_001999785.1
Burkholderia cenocepacia	VC12802	Patient	Canada	GCA_001999825.1
Burkholderia cenocepacia	K56-2	Patient	Canada	GCA_014357995.1
Burkholderia cenocepacia	CR318	Plant	Canada	GCA_002007585.1
Burkholderia cenocepacia	VC12308	Patient	Canada	GCA_001999885.1
Burkholderia cenocepacia	VC2307	Patient	Canada	GCA_001999805.1
Burkholderia cenocepacia	895	Patient	Malaysia	GCA_001606135.1
Burkholderia cenocepacia	IST439	Patient	Portugal	GCA_903231545.1
Burkholderia cenocepacia	GIMC4560:Bcn122	Patient	Russia	GCA_002083015.1
Burkholderia cenocepacia	FDAARGOS_720	Patient	USA	GCA_012273415.1
Burkholderia cenocepacia	FDAARGOS_734	Patient	USA	GCA_013349105.1
Burkholderia cenocepacia	FL-5-3-30-S1-D7	Environemnt	USA	GCA_001718515.1
Burkholderia cenocepacia	BC1	Patient	China	SAMN29388125
Burkholderia cenocepacia	BC2	Patient	China	SAMN29388126
Burkholderia vietnamiensis	MSMB608WGS	Plant	Australia	GCA_001718915.1
Burkholderia vietnamiensis	BCC0581	Patient	Canada	GCA_902833405.1
Burkholderia vietnamiensis	BCC0185	Patient	Chile	GCA_902833315.1
Burkholderia vietnamiensis	BCC1408	Patient	England	GCA_902833505.1
Burkholderia vietnamiensis	JW13	Environemnt	England	GCA_900634425.1
Burkholderia vietnamiensis	BE10	Plant	France	GCA_003849655.1
Burkholderia vietnamiensis	BCC1878	Patient	Germany	GCA_902829795.1
Burkholderia vietnamiensis	FDAARGOS_1488	Unknown	Germany	GCA_020099355.1
Burkholderia vietnamiensis	FDAARGOS_1517	Patient	Germany	GCA_020509375.1
Burkholderia vietnamiensis	FDAARGOS_1590	Unknown	Germany	GCA_020736425.1
Burkholderia vietnamiensis	RS1	Unknown	Japan	GCA_003203575.1
Burkholderia vietnamiensis	BCC0268	Patient	New Zealand	GCA_902833425.1
Burkholderia vietnamiensis	BVI2075	Unknown	Senegal	GCA_914484805.1
Burkholderia vietnamiensis	MAG24	Plant	Sweden	GCA_014860525.1
Burkholderia vietnamiensis	BCC0142	Patient	USA	GCA_902833265.1
Burkholderia vietnamiensis	BCC0151	Patient	USA	GCA_902833395.1
Burkholderia vietnamiensis	BCC0157	Patient	USA	GCA_902833295.1
Burkholderia vietnamiensis	BCC0190	Patient	USA	GCA_902830265.1
Burkholderia vietnamiensis	FDAARGOS_721	Patient	USA	GCA_022213445.1
Burkholderia vietnamiensis	FL-2-3-10-S3-D0	Environemnt	USA	GCA_001523705.1
Burkholderia vietnamiensis	FL-7-2-10-S2-D0	Environemnt	USA	GCA_001524205.1
Burkholderia vietnamiensis	FL-7-3-30-S2-D0	Environemnt	USA	GCA_001524225.1
Burkholderia vietnamiensis	FL-7-4-10-S1-D0	Environemnt	USA	GCA_001524235.1
Burkholderia vietnamiensis	FL-7-4-30-S2-D0	Environemnt	USA	GCA_001524265.1
Burkholderia vietnamiensis	FL-7-4-30-S3-D0	Environemnt	USA	GCA_001524285.1
Burkholderia vietnamiensis	FL-7-5-30-S2-D0	Environemnt	USA	GCA_001524305.1
Burkholderia vietnamiensis	HI3392	Patient	USA	GCA_001529645.1
Burkholderia vietnamiensis	HI3908	Patient	USA	GCA_001530215.1
Burkholderia vietnamiensis	LA-5-5-30-S1-D2	Environemnt	USA	GCA_001523535.1
Burkholderia vietnamiensis	LA-6-3-30-S1-D2	Environemnt	USA	GCA_001522565.1
Burkholderia vietnamiensis	PC082	Plant	USA	GCA_001541005.1
Burkholderia vietnamiensis	WW_17	Unknown	USA	GCA_004343565.1
Burkholderia vietnamiensis	HI2221	Plant	Viet Nam	GCA_001528585.1
Burkholderia vietnamiensis	LMG 10929	Environemnt	Viet Nam	GCA_902830295.1
Burkholderia vietnamiensis	HI2297	Plant	Indonesia	GCA_001718815.1
Burkholderia vietnamiensis	BVI1335	Unknown	Unknown	GCA_914484905.1
Burkholderia vietnamiensis	BVIET434	Unknown	Unknown	GCA_914484955.1
Burkholderia vietnamiensis	Vit1	Patient	China	SAMN29388124
Burkholderia gladioli	ATCC10248	Unknown	Unknown	GCA_000959725.1
